# Supplementary material for: Proteome-wide structural changes measured with limited proteolysis-mass spectrometry: an advanced protocol for high-throughput applications
Source: Springer Nature journal article supplement (doi:10.1038/s41596-022-00771-x), 2022-12-16
Supplement: MOESM1 [file 41596_2022_771_MOESM1_ESM22.pdf]

## Supplementary information

---

# Proteome-wide structural changes measured with limited proteolysis-mass spectrometry: an advanced protocol for high-throughput applications

---

In the format provided by the authors and unedited

## Supplementary Discussion

### Benchmarking abundance correction approaches for LiP-MS

To identify structurally altered peptides, LiP-MS data are corrected using the tryptic controls to distinguish between protein abundance and structural contributions to the detected change. We adapted the correction method described in Tsai and Vitek (2020) to estimate peptide and protein abundances in the LiP and TrP datasets and combine them to adjust LiP peptide changes with respect to protein abundance variations. To test the performance of this correction method over the one described in Schopper et al. (2017), we generated a combinatorial dataset where the same protein, human  $\alpha$ -Synuclein, was spiked-in into a yeast background at two different concentrations (5 pmol/ $\mu$ g lysate and 20 pmol/ $\mu$ g lysate) and two different conformations (monomer, M, and fibril, F) (Extended Data Figure 9a). The resulting data were analyzed following the classic workflow and with the MSstatsLiP package and the results of the two correction approaches were compared. Overall, both methods performed well in term of protein abundance correction but when we compared the monomer form at two different concentrations, where no structural rearrangements are expected, both analyses identified structurally altered LiP peptides. To investigate the nature of the structural alterations detected when comparing monomeric  $\alpha$ -Synuclein, we repeated the LiP experiment on pure preparations of  $\alpha$ -Synuclein, mixing the resulting peptides (instead of the proteins) with a yeast digest right before the MS analysis (Extended Data Figure 9b). We then repeated the same comparative analysis and focused on the comparison between monomeric  $\alpha$ -Synuclein at two different concentrations. Interestingly, all the significant peptides identified in the non-adjusted dataset disappeared after correction, except for one HT peptide identified with the classic approach and one with MSstatsLiP (Extended Data Figure 9c) indicating the structural alteration detected in the benchmark dataset was a consequence of the interaction of monomeric  $\alpha$ -Synuclein with the yeast background. When restricting the analysis to only fully tryptic peptides, none of them were significantly affected in the M1 vs M2 comparison, in contrast to the unadjusted data where the structurally affected region covered a significant portion of the protein, including the NAC domain (Ueda et al., 1993) (Extended Data Figure 9d).

### Titration analysis with MSstatsLiP

MSstatsLiP offers the possibility to analyze data sets with multiple data points by adapting the linear mixed effect model to account for between-subject heterogeneity over different data points. Here we test the potential benefit of employing such a multiple data points model for a repeated measures design (e.g. where a sample is treated with multiple drug doses), since multiple-dose analysis outperforms single-dose experiments for the identification of drug targets (Piazza et al., (2020)). We applied MSstatsLiP to a drug dose titration experiment where Rapamycin was added to a yeast lysate at nine different concentrations (Piazza et al., 2020). When analysing every drug concentration as an independent experiment, we identified two structurally altered peptides in the known target of rapamycin (FPR1) but only at the highest concentration (significance cutoffs:  $abs(\log_2FC) > 1$ ,  $qvalue < 0.01$ , Fig. 7a). On the contrary, when we performed the multiple dose analysis including all nine rapamycin concentrations (See LiP.MS data analysis multiple dose study notebook) we identified two peptides as significantly changing in the highest number of conditions (Extended Data Figure 7a,b), and one of the two mapped to the binding site of rapamycin in the target FPR1 (Extended Data Figure 7c).

### Influence of total protein concentration on proteinase K cleavage patterns

Some sample types – for example, clinical samples – are limited in protein amount and it is thus not possible to adjust all samples to a standard concentration (step 1). In these cases, total protein concentration may vary between samples, which could affect PK cleavage patterns.

To probe the effect of varying total protein concentration, we analyzed a cell lysate with protein concentrations ranging from 0.125 to 2  $\mu\text{g}/\mu\text{l}$  using an E:S ratio of 1:100. The total protein concentration of each sample has a pronounced impact on the observed cleavage pattern, which is apparent in a principal component analysis (Extended Data Figure 3). Since this effect reduces comparability of samples with different total protein concentrations, we recommend diluting all samples to the concentration of the most dilute sample (see step 1).

## Supplementary Tables

*Table 1: DIA isolation window settings*

| Lower limit | Center | Upper limit | Isolation window width |
|-------------|--------|-------------|------------------------|
| 350         | 358    | 366         | 16                     |
| 365         | 373    | 381         | 16                     |
| 380         | 388    | 396         | 16                     |
| 395         | 403    | 411         | 16                     |
| 410         | 418    | 426         | 16                     |
| 425         | 433    | 441         | 16                     |
| 440         | 448    | 456         | 16                     |
| 455         | 463    | 471         | 16                     |
| 470         | 478    | 486         | 16                     |
| 485         | 493    | 501         | 16                     |
| 500         | 508    | 516         | 16                     |
| 515         | 523    | 531         | 16                     |
| 530         | 538    | 546         | 16                     |
| 545         | 553    | 561         | 16                     |
| 560         | 568    | 576         | 16                     |
| 575         | 583    | 591         | 16                     |
| 590         | 598    | 606         | 16                     |
| 605         | 613    | 621         | 16                     |
| 620         | 628    | 636         | 16                     |
| 635         | 643    | 651         | 16                     |
| 650         | 659    | 668         | 18                     |
| 667         | 676    | 685         | 18                     |
| 684         | 693    | 702         | 18                     |
| 701         | 710    | 719         | 18                     |
| 718         | 727    | 736         | 18                     |
| 735         | 744    | 753         | 18                     |
| 752         | 761    | 770         | 18                     |
| 769         | 778    | 787         | 18                     |
| 786         | 795    | 804         | 18                     |
| 803         | 813    | 823         | 20                     |

|      |        |      |    |
|------|--------|------|----|
| 822  | 832    | 842  | 20 |
| 841  | 851    | 861  | 20 |
| 860  | 870    | 880  | 20 |
| 879  | 889    | 899  | 20 |
| 898  | 908    | 918  | 20 |
| 917  | 929.5  | 942  | 25 |
| 941  | 953.5  | 966  | 25 |
| 965  | 977.5  | 990  | 25 |
| 989  | 1006.5 | 1024 | 35 |
| 1023 | 1048   | 1073 | 50 |
| 1072 | 1111   | 1150 | 78 |

Table 2: Expected HT content in different sample types

| <b>Sample type</b>     | <b>Sample</b>           | <b>Expected HT content</b> |
|------------------------|-------------------------|----------------------------|
| <b>complex, lysate</b> | <i>S. cerevisiae</i>    | ~30%                       |
| <b>complex, lysate</b> | <i>E. coli</i> lysate   | ~40%                       |
| <b>complex, lysate</b> | Mammalian cell lysate   | ~30%                       |
| <b>complex, lysate</b> | Brain homogenate        | ~30%                       |
| <b>complex, fluid</b>  | Red blood cell fraction | ~45%                       |
